1       **Enrichment of novel *Verrucomicrobia*, *Bacteroidetes* and *Krumholzibacteria* in an oxygen-**  
2       **limited, methane- and iron-fed bioreactor inoculated with Bothnian Sea sediments**

3  
4 Paula Dalcin Martins<sup>1,2\*,\*\*</sup>, Aniek de Jong<sup>1,3\*</sup>, Wytze K. Lenstra<sup>3,4</sup>, Niels A. G. M. van Helmond<sup>3,4</sup>,  
5 Caroline P. Slomp<sup>3,4</sup>, Mike S. M. Jetten<sup>1,2,3</sup>, Cornelia U. Welte<sup>1,2</sup>, Olivia Rasigraf<sup>1,3,5\*\*</sup>

6  
7 <sup>1</sup>Department of Microbiology, Radboud University Nijmegen, Nijmegen, The Netherlands

8 <sup>2</sup>Soehngen Institute of Anaerobic Microbiology (SIAM), Radboud University Nijmegen, Nijmegen,  
9 The Netherlands

10 <sup>3</sup>Netherlands Earth System Science Centre (NESSC), Utrecht, The Netherlands

11 <sup>4</sup>Department of Earth Sciences, Utrecht University, The Netherlands

12 <sup>5</sup>German Research Centre for Geosciences (GFZ), Geomicrobiology, Potsdam, Germany

13 \*First co-authors

14 \*\*Corresponding authors

15  
16 **Abstract**

17 Microbial methane oxidation is a major biofilter preventing larger emissions of this powerful  
18 greenhouse gas from marine coastal areas into the atmosphere. In these zones, various electron  
19 acceptors such as sulfate, metal oxides, nitrate or oxygen can be utilized. However, the key microbial  
20 players and mechanisms of methane oxidation are poorly understood. In this study, we inoculated a  
21 bioreactor with methane- and iron-rich sediments from the Bothnian Sea in order to investigate  
22 microbial methane and iron cycling under low oxygen concentrations. Using metagenomics, we  
23 observed shifts in the microbial community over approximately 2.5 years of bioreactor operation.  
24 Marker genes for methane and iron cycling, as well as respiratory and fermentative metabolism, were  
25 investigated. Metagenome-assembled genomes representing novel *Verrucomicrobia*, *Bacteroidetes*  
26 and *Krumholzibacteria* were recovered and revealed potential for methane oxidation, organic matter  
27 degradation, and iron cycling, respectively. This work brings new insights into the identity and  
28 metabolic versatility of microorganisms that may be members of such functional guilds in coastal  
29 marine sediments and highlights that the methane biofilter in these sediments may be more diverse  
30 than previously appreciated.

31  
32 **Importance**

33 Despite the essential role of microorganisms in preventing most methane in the ocean floor to reach  
34 the atmosphere, comprehensive knowledge on the identity and the mechanisms employed by these  
35 microorganisms is still lacking. This is problematic because such information is needed to understand  
36 how the ecosystem functions in the present and how microorganisms may respond to climate change  
37 in the future. Here, we enriched and identified novel taxa potentially involved in methane and iron  
38 cycling in an oxygen-limited bioreactor inoculated with methane- and iron-rich coastal sediments.  
39 Metagenomic analyses provided hypotheses about the mechanisms they may employ, such as the use

40 of oxygen at very low concentrations. The implication of our results is that in more shallow sediments,  
41 where oxygen-limited conditions are present, the methane biofilter is potentially composed of novel,  
42 metabolically versatile *Verrucomicrobia* that could contribute to mitigating methane emissions from  
43 coastal marine zones.

44

#### 45 **Keywords**

46 methane oxidation, iron cycling, Bothnian Sea, low oxygen, coastal sediments, methanotrophs

47

#### 48 **Introduction**

49 Archaea and bacteria capable of methane oxidation largely prevent global emissions of  
50 methane, a greenhouse gas 28-105 times more potent than carbon dioxide for global warming, into  
51 the atmosphere (1). In deep marine sediments, archaeal methanotrophs are predicted to consume more  
52 than 90% of the *in-situ* generated methane in cooperation with sulfate-reducing bacteria (2). In this  
53 way, a biofilter that prevents larger methane emissions from these ecosystems is established. Recent  
54 estimates suggest that 45-61 Tg of methane are oxidized annually in marine sediments with sulfate,  
55 the dominant terminal electron acceptor for methane oxidation in such environments (3). However,  
56 methanotrophs operating under low oxygen concentrations and using alternative electron acceptors  
57 such as iron and manganese oxides, nitrate or even limited amounts of oxygen are poorly identified,  
58 and the mechanisms and metabolism they employ are not yet well explored. Characterizing these  
59 microorganisms and understanding their environmental functioning is fundamental to estimate  
60 impacts of climate change and eutrophication in coastal sediments, to design more predictive models,  
61 and to create possible future bioremediation and restoration strategies.

62 Iron oxides are globally distributed in marine coastal sediments (4). Anaerobic oxidation of  
63 methane coupled to iron reduction (Fe-AOM) is hypothesized to account for elevated dissolved iron  
64 concentrations in methanic zones, particularly in the Baltic and Bothnian Sea, North Sea and Black  
65 Sea (4). However, despite strong biogeochemical evidence for Fe-AOM (5–7), this remains one of  
66 the least elucidated methane-cycling metabolisms. Archaea affiliated to the cluster ANME-2d, of the  
67 genus *Candidatus* Methanoperedens, were the first identified microorganisms to show methane  
68 oxidation activity at the expense of Fe and manganese (Mn) reduction, likely reversing the  
69 methanogenesis pathway (8). *Candidatus* Methanoperedens nitroreducens, the first archaeon  
70 described to couple methane oxidation to nitrate reduction (9, 10), was shown to perform Fe- and  
71 Mn-AOM in short-term experiments with iron citrate, nanoparticulate ferrihydrite and birnessite in  
72 follow-up studies (8). Recent investigations (11, 12) enriched related Fe- and Mn-AOM  
73 Methanoperedens species, namely *Ca.* Methanoperedens ferrireducens, *Ca.* Methanoperedens  
74 manganicus, and *Ca.* Methanoperedens manganireducens from organic-rich freshwater sediments in  
75 Australia after two years of cultivation. The genomes of the various *Ca.* Methanoperedens strains  
76 encode several multiheme *c*-type cytochrome proteins that are implicated in the extracellular  
77 electron transfer pathways needed to convey electrons to the metal oxides (12–15).

78 Interestingly, bacteria commonly implicated in aerobic methane oxidation via particulate

79 methane monooxygenase (PMO) have very recently been suggested to be capable of Fe-AOM via a  
80 yet unknown mechanism. Pure cultures of the gammaproteobacterial and alphaproteobacterial  
81 methanotrophs *Methylomonas* and *Methylosinus* were shown to couple methane oxidation to  
82 ferrihydrite reduction under the availability of 0.89 mg O<sub>2</sub> L<sup>-1</sup> (16). Bacterial methanotrophs were  
83 suggested to account for Fe-AOM in oxygen-depleted incubations with sediments from Lake  
84 Kinneret in Israel (17) and in anoxic waters of Northwestern Siberian lakes (18). How methane may  
85 be activated by PMO in the absence of oxygen or at nanomolar concentrations of oxygen is not yet  
86 known, but could have similarities to the mechanism employed by *Ca. Methylomirabilis* species (19,  
87 20). How pure cultures of these methanotrophs could reduce iron while their genomes lack known  
88 marker genes for iron reduction is another question that remains unanswered.

89 The brackish Bothnian Sea is located in the northern part of the Baltic Sea and, in contrast to  
90 the rest of the Baltic Sea basin, is an oligotrophic ecosystem. These conditions have established due  
91 to the topography, which hinders input of nutrient-rich waters from the south. The Bothnian Sea is  
92 fed by several major rivers that transport freshwater, terrestrial organic carbon and metal oxides into  
93 the ecosystem (21). Low salinity and high sedimentation rates have enabled the establishment of a  
94 relatively shallow sulfate-methane transition zone (SMTZ). Below the SMTZ, ferric oxides  
95 (ferrihydrite) can accumulate and act as terminal electron acceptors for AOM (6). A recent study from  
96 another area in the Baltic Sea, Pojo Bay estuary in Finland, also provided evidence for AOM below  
97 the SMTZ in Fe-rich coastal sediments (22). The microbial communities from both ecosystems  
98 exhibited significant similarities, including dominant taxa such as ANME-2a/b, *Methanomicrobia*,  
99 *Bathyarchaeota*, *Thermoplasmata*, *Bacteroidetes*, *Chloroflexi*, *Verrucomicrobia*, and *Proteobacteria*  
100 ( $\alpha$ -,  $\beta$ -,  $\gamma$ -) (22, 23). However, a direct link between particular taxa and Fe-AOM activity in Baltic  
101 Sea sediments is still lacking.

102 Previous metagenomic and biogeochemical studies have indicated that a variety of electron  
103 acceptors and different guilds of microorganisms, including various putative methanotrophs, are  
104 present in Bothnian Sea sediments (6, 23, 24) and could play a role in carbon, sulfur, nitrogen, and  
105 iron cycling. To better understand the metabolism and ecophysiology of these organisms, we  
106 inoculated a bioreactor with oxygen-depleted sediment from an iron and methane-rich sediment from  
107 a coastal site in the Bothnian Sea. Previous incubation experiments (6) and modelling studies (25, 26)  
108 have indicated Fe-AOM activity in these sediments. The reactor received methane and ferric iron  
109 (both Fe(III) nitrilotriacetic acid and ferrihydrite nanoparticles) in order to enrich microorganisms  
110 involved in methane oxidation and iron reduction. Microbial community dynamics were followed  
111 with metagenomics for approximately 2.5 years. This cultivation effort resulted in the enrichment of  
112 novel *Verrucomicrobia*, *Bacteroidetes* and *Krumholzibacteria*, which are hypothesized to be involved  
113 in methane oxidation, organic matter degradation and iron cycling, respectively.

114

## 115 **Methods**

### 116 **Bioreactor setup**

117 The enrichment culture was operated in sequencing batch mode in a jacketed 3L-glass

118 bioreactor (Applikon, Delft, The Netherlands) at a working volume of 2 L. Medium ( $0.3 \text{ L day}^{-1}$ ) was  
119 continuously supplied, except during daily settling (1h) and effluent pumping out times (30 minutes).  
120 The reactor was inoculated on 20 June 2016 with 411 g of wet sediment collected on 6 August 2015  
121 from sampling site NB8 in the Bothnian Sea (N  $63^{\circ}29.071$ , E  $19^{\circ}49.824$ ) (26). The sediment was  
122 derived from 37-42 cm depth, located below the SMTZ, where the pore water sulfate concentration  
123 was below the detection limit ( $<75 \mu\text{M}$ ), but where methane and Fe(II) concentrations were in the  
124 millimolar range, and iron oxides were abundant (26). Between sampling and inoculation, the  
125 sediment was stored anoxically at  $4^{\circ}\text{C}$  in the dark in a sealed aluminum bag under dinitrogen gas  
126 pressure. The medium consisted of 0.1 mM  $\text{KH}_2\text{PO}_4$ , 2 mM KCl, 3 mM  $\text{CaCl}_2$ , 80 mM NaCl, 9.5  
127 mM  $\text{MgCl}_2$ , 0.2 mM  $\text{NH}_4\text{Cl}$ , 5 mM Fe(III) nitrilotriacetic acid (NTA), and the trace element solution  
128 ( $2 \text{ mL} / 10 \text{ L}$ ) was made as previously described (27) and supplemented with 0.2 mM  $\text{Ce}_2(\text{SO}_4)_3$ . The  
129 Fe(III)NTA solution (200 mM) was made according to the following protocol: 57.3 g of NTA was  
130 added to 200 mL MilliQ water and the pH was adjusted to 7-8 with 10M NaOH until the NTA was  
131 dissolved. After addition of 16.4 g  $\text{NaHCO}_3$  and 27.0 g  $\text{FeCl}_3 \cdot 6\text{H}_2\text{O}$  to the dissolved NTA, the volume  
132 was adjusted to 500 mL with MilliQ water. The solution was made sterile by passing it through a  $0.2 \mu\text{m}$   
133 filter. Additionally, the reactor received 10-12 mM of  $\text{Fe}(\text{OH})_3$  (ferrihydrite) nanoparticles,  
134 synthesized as previously described (28), once a month from 7 Aug 2017.

135 The medium was constantly sparged with an Ar/ $\text{CO}_2$  gas mixture (95:5) and the culture was  
136 continuously sparged with a  $\text{CH}_4/\text{CO}_2$  gas mixture (95:5, the Linde Group, The Netherlands) with a  
137 flow rate of  $10 \text{ mL min}^{-1}$ . The liquid volume was maintained by a level-controlled effluent pump, the  
138 stirring was set at 150 r.p.m., and the reactor was kept at room temperature ( $21^{\circ}\text{C}$ ). The pH was  
139 monitored using an ADI 1010 Bio Controller (Applikon, Delft, The Netherlands) and maintained at  
140 pH 7.59 by a pH controller loop using potassium hydrogen carbonate ( $\text{KHCO}_3$ ) as base and  $\text{CO}_2$  gas  
141 as acid. Oxygen was monitored by a Clark-type oxygen electrode (Applikon, Delft, The Netherlands)  
142 and measured during activity assays as described below. During the standard operation mode of the  
143 bioreactor, oxygen concentrations were below the detection limit of the electrode. To prevent growth  
144 of photosynthetic organisms and to prevent the reduction of iron by UV light, the reactor was wrapped  
145 in black foil, and black tubing with low oxygen permeability was used (Masterflex Norprene, Cole  
146 Parmer, USA).

147

## 148 **Activity assays**

149 Whole reactor activity tests were conducted twice, one in 2016 and one in 2017, as follows.  
150 Medium supply, effluent outflow, and base pump were stopped and the reactor was flushed with  
151 Ar/ $\text{CO}_2$  (95:5) while stirring. Methane concentrations were measured in the headspace, and when  
152 undetectable (below 1.8 ppm),  $^{13}\text{CH}_4$  was added to a final concentration of 10% in the headspace.  
153 Fe(III)NTA (5-10 mM) or  $\text{Fe}(\text{OH})_3$  nanoparticles (10 mM) were tested as terminal electron  
154 acceptors. For batch activity tests, which were performed in 2018, 12.8-15 mL of reactor biomass  
155 was placed into 30 mL-serum bottles and incubated with a combination of electron acceptors and  
156 donors (in duplicates). The following conditions were set up: all bottles were kept at 0.5 bar

157 overpressure, electron donors were  $^{13}\text{CH}_4$  at 75% of the headspace or 2 mM acetate, and electron  
158 acceptors were 15 mM  $\text{Fe}(\text{OH})_3$  nanoparticles, 15 mM  $\text{Fe}(\text{III})$  citrate, 2 mM magnesium sulfate,  
159 or  $\text{O}_2$  at 5% of the headspace. Control bottles included biomass and only methane or oxygen.

160 Headspace samples (100  $\mu\text{L}$ ) were withdrawn with a gas tight glass syringe (Hamilton,  
161 Switzerland) and methane was immediately measured in technical triplicates on a HP 5890 gas  
162 chromatograph equipped with a Porapak Q column (80/100 mesh) and flame ionization detector  
163 (Hewlett Packard, Palo Alto, CA, USA). For  $^{13}\text{CO}_2$  and  $\text{O}_2$  technical duplicate measurements, 50  
164  $\mu\text{L}$  of headspace was injected into an Agilent 6890 series gas chromatograph coupled to a mass  
165 spectrometer (Agilent, Santa Clara, CA, USA) equipped with a Porapak Q column heated at  $80^\circ\text{C}$   
166 with helium as the carrier gas. Gas concentrations were calculated using a calibration curve made  
167 with gas standards, and liquid-dissolved concentrations were estimated with the Ostwald  
168 coefficient (29). Iron concentrations were measured in technical duplicates using the colorimetric  
169 ferrozine method (30). Briefly, 30  $\mu\text{L}$  of a solid-free reactor liquid sample was mixed with 30  $\mu\text{L}$   
170 1M HCl in an eppendorf tube (for ferrous iron), and in another tube 30  $\mu\text{L}$  of solid-free liquid  
171 sample was mixed with 30  $\mu\text{L}$  of saturated hydroxyl amine solution in 1M HCl (for total iron).  
172 After incubation of 1 hour at room temperature, 10  $\mu\text{L}$  of the solution was added to 100  $\mu\text{L}$   
173 ferrozine reagents (0.05% wt. / vol. ferrozine (PDT disulfonate: 3-[2-Pyridyl]-5,6-diphenyl-1,2,4-  
174 trizaine-4,4-disulfonic acid sodium salt) in 50 mM 4-(2-hydroxyethyl)-1-piperazineethanesulfonic  
175 acid (HEPES) buffer, pH 7.0) and 500  $\mu\text{L}$  of MilliQ water. The absorbance was measured at 562  
176 nm using a SpectraMax 190 microplate reader (Molecular Devices, Sunnyvale, CA, USA). The  
177 ferric iron content was calculated by subtracting the concentration of ferrous iron from the  
178 concentration of the total reduced ferrous iron. Activity data was imported into RStudio v1.2.5033  
179 (R v3.6.3) (31) and graphs were constructed with ggplot2 v3.3.2 (32).

180

## 181 **DNA extraction, metagenomic sequencing, data processing, and analyses**

182 DNA was extracted from original sediments (herein referred to as T0) and from biomass after  
183 16 months (T1) and 29 months (T2) of reactor operation. All DNA extractions were performed using  
184 the DNeasy PowerSoil DNA extraction kit (Qiagen, Hilden, Germany) according to the  
185 manufacturer's instructions. One extra DNA extraction of T2 with the ammonium acetate method  
186 (33) was conducted and used only for assembly and binning purposes. Metagenomic sequencing was  
187 performed in-house using the Illumina Nextera® XT Library Prep Kit according to the manufacturer's  
188 instructions (Illumina, San Diego, CA, USA). The library was normalized to 4 nM and sequencing  
189 was performed with an Illumina MiSeq using the sequencing protocol for 300 bp paired-end reads.  
190 Resulting reads (~4 Gbp per sample) were trimmed and quality-controlled with BBDuk  
191 (<https://sourceforge.net/projects/bbmap/>), then co-assembled with MEGAHIT v1.2.9 (34). Read  
192 mapping was performed with BBMap (<https://sourceforge.net/projects/bbmap/>) and mapping files  
193 were handled with samtools v1.9 (using htslib v1.9) (35). Contigs were binned with four methods all  
194 using default parameters: binsanity v2.0.0 (36), concoct v1.1.0 (37), maxbin2 v2.2.7 (38) and  
195 metabat2 v2.15 (39). Bins were supplied to DAS tool v1.1.2 (40) for consensus binning and to

196 CheckM v1.1.2 (41) for quality inference of metagenome-assembled genomes (MAGs).

197 Taxonomic classification of MAGs was obtained with GTDB-Tk v0.3.2 (42), and  
198 phylogenetic trees for MAG placement were constructed using UBGC v3.0 (43). MAGs were gene-  
199 called with prodigal v2.6.3 (44) and annotated with KEGG KAAS (45), prokka v1.13.3 (46), and  
200 DRAM v0.0.1 (47) in KBase (48). Marker genes for iron metabolism were searched with FeGenie  
201 (49), while other genes of interest were searched using hmmsearch (HMMER 3.3 with --cut\_tc) (50),  
202 blastp (51), prokka and DRAM annotation files. The following hmms were downloaded from PFAM  
203 (<https://pfam.xfam.org/>) or TIGRFAMs (<http://tigrfams.jcvi.org/cgi-bin/index.cgi>): PF02240.16  
204 (MCR\_gamma), PF02241.18 (MCR\_beta), PF02783.15 (MCR\_beta\_N), PF02249.17 (MCR\_alpha),  
205 PF02745.15 (MCR\_alpha\_N), PF14100.6 (PmoA), PF04744.12 (PmoB and AmoB), PF02461.16  
206 (AMO), TIGR04550 (MmoD), PF02406.17 (MmoB/DmpM family), and PF02964.16 (Methane  
207 monooxygenase, hydrolase gamma chain). Average amino acid identity was calculated using the  
208 Kostas lab enveomics tool (52) available at <http://enve-omics.ce.gatech.edu/aai/index>.

209 Phylogenetic trees for specific genes of interest were constructed by retrieving reference  
210 sequences from NCBI (<https://www.ncbi.nlm.nih.gov/protein/>), aligning them with MUSCLE  
211 v3.8.31 (53), stripping alignment columns with trimAl v1.4.rev22 (54) (with -gappypout) and  
212 calculating trees with FastTree v2.1.10 (55). Trees were visualized on iTol (56). Reads per kilobase  
213 per million mapped reads (RPKM) values for genes of interest were calculated by mapping reads to  
214 these genes with BMap using the option rpk. Data frames were imported into RStudio v1.2.5033  
215 (R v3.6.3) (31) and heat maps were constructed using the packages vegan v2.5-6 and ggplot2 v3.3.2  
216 (32), with the function heatmap.2. All figures were edited in Adobe Illustrator CC 2018 (Adobe, San  
217 Jose, California, USA).

218

## 219 **Data availability**

220 Raw sequencing reads, metagenome-assembled genomes, and unbinned contigs have been deposited  
221 on NCBI under the BioProject accession number PRJNA663545.

222

## 223 **Results and Discussion**

### 224 **Retrieved metagenome-assembled genomes revealed microbial community shifts over reactor 225 operation time**

226 Over the course of 29 months, the occurrence of iron reduction was obvious from the color  
227 change in the reactor and production of iron (II) in activity tests (Figure S1). Consumption of methane  
228 especially at the expense of iron (III) was less apparent (Figure S1). We did observe production of  
229  $^{13}\text{CO}_2$  from  $^{13}\text{CH}_4$ , but could not ascertain that this was coupled to stoichiometric iron reduction. Most  
230 surprisingly, after more than 2 years of operation under low headspace oxygen concentrations,  
231 generally between 70 and 0.4  $\mu\text{M}$  (calculated liquid-dissolved oxygen between 4.7 and 0.27  $\mu\text{M}$ ), we  
232 still detected quite high levels of oxygen-dependent methane oxidation (Figure S1).

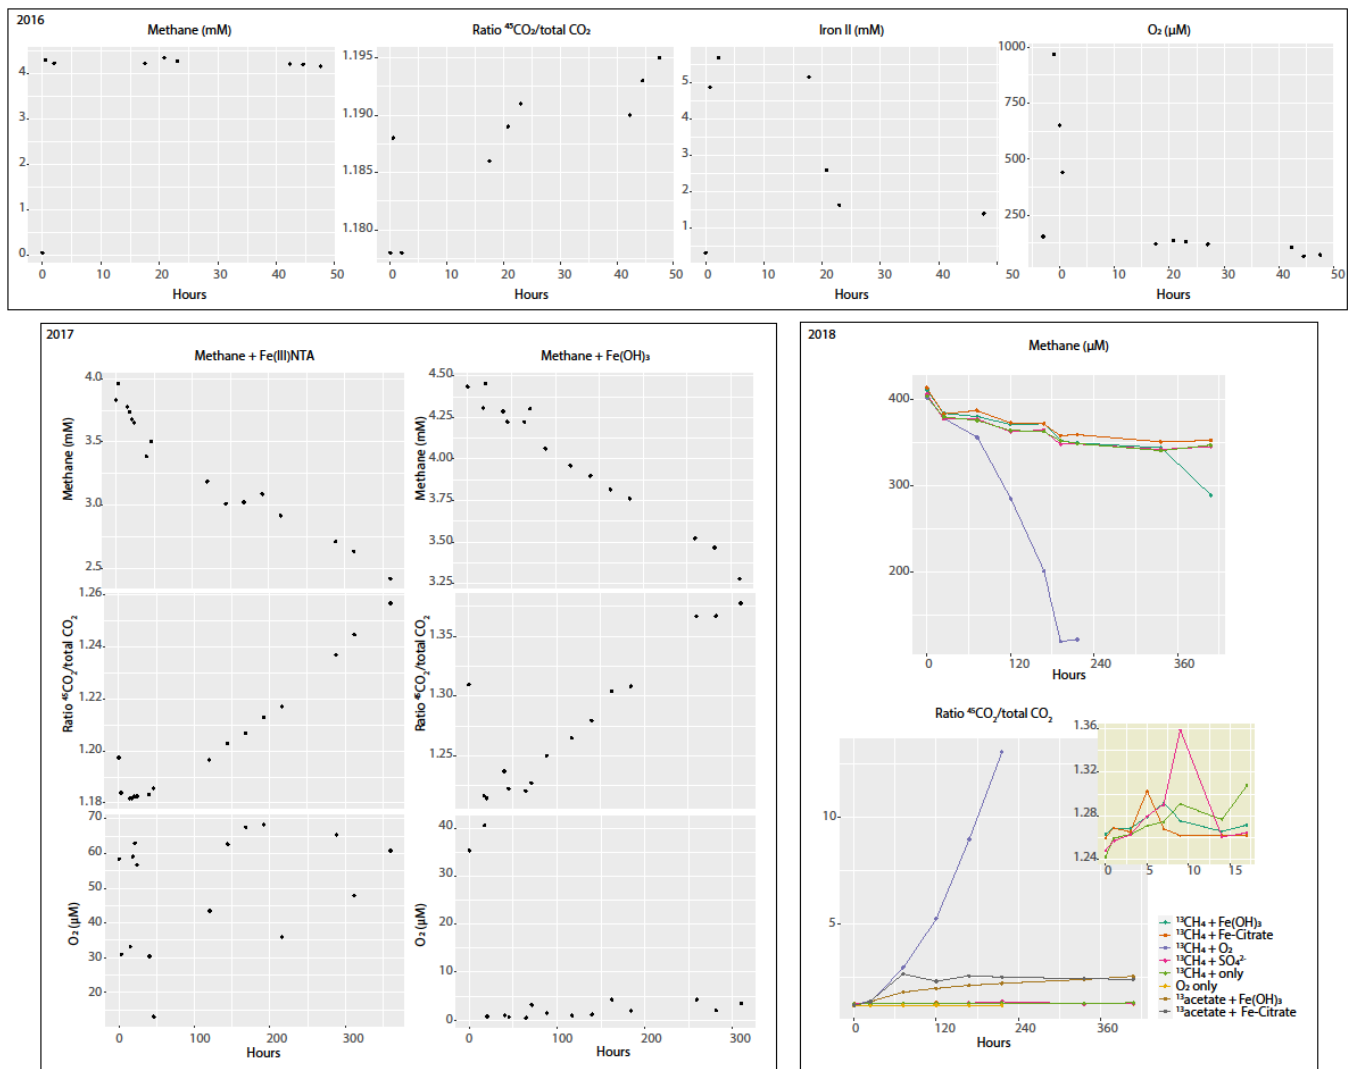

233

234

235

236

237

238

239

240

241

242

243

244

245

246

247

248

249

**Figure S1 | Summary of activity tests.** Data are categorized based on the year when measurements were conducted. In 2016 and 2017, whole reactor experiments were performed, in which the reactor was set as a closed system and substrates were followed for several hours. In 2018, bioreactor biomass was incubated into serum bottles with combinations of electron donors and acceptors as indicated in the figure and detailed in the methods section. The inset in yellow displays a zoom in on some incubations as specified in the legend. Oxygen measurements reflect headspace concentrations.

In order to investigate the changes in the microbial community, original sediments and bioreactor samples were subjected to DNA extractions and metagenomic sequencing. Illumina sequencing, co-assembly, and binning allowed the reconstruction of 56 MAGs (Figure 1) from three time points: original sediments (T0), bioreactor biomass 16 months after reactor inoculation (T1), and 29 months after reactor inoculation (T2). Together, these 56 MAGs represented 35.8%, 81.5%, and 79.1% of metagenome reads at T0, T1, and T2, respectively. In original sediments, three MAGs represented 6-9% of metagenome reads each: thermoplasmata\_1, aminicenantales\_1, and bipolaricaulia\_1. Using percent of reads mapped to each genome as a proxy for abundance, these organisms seemed to disappear by T2 (Table S1). At T1, 31% of metagenome reads mapped to the

250 MAG desulfuromonadales\_1, potentially representing the most abundant organism in the reactor at  
 251 that time, followed by bacteroidales\_2, with 8.6%, and burkholderiales\_1, with 6.9%. By T2, these  
 252 microorganisms appeared to become rare members of the community. Finally, at T2, three MAGs  
 253 accounted for 29.7% of metagenome reads: the verrucomicrobial MAG pedosphaeraceae\_1, with  
 254 10.5% of reads, bacteroidales\_8 with 10.1%, and krumholzibacteria\_1 with 9.1% (Table S1).  
 255

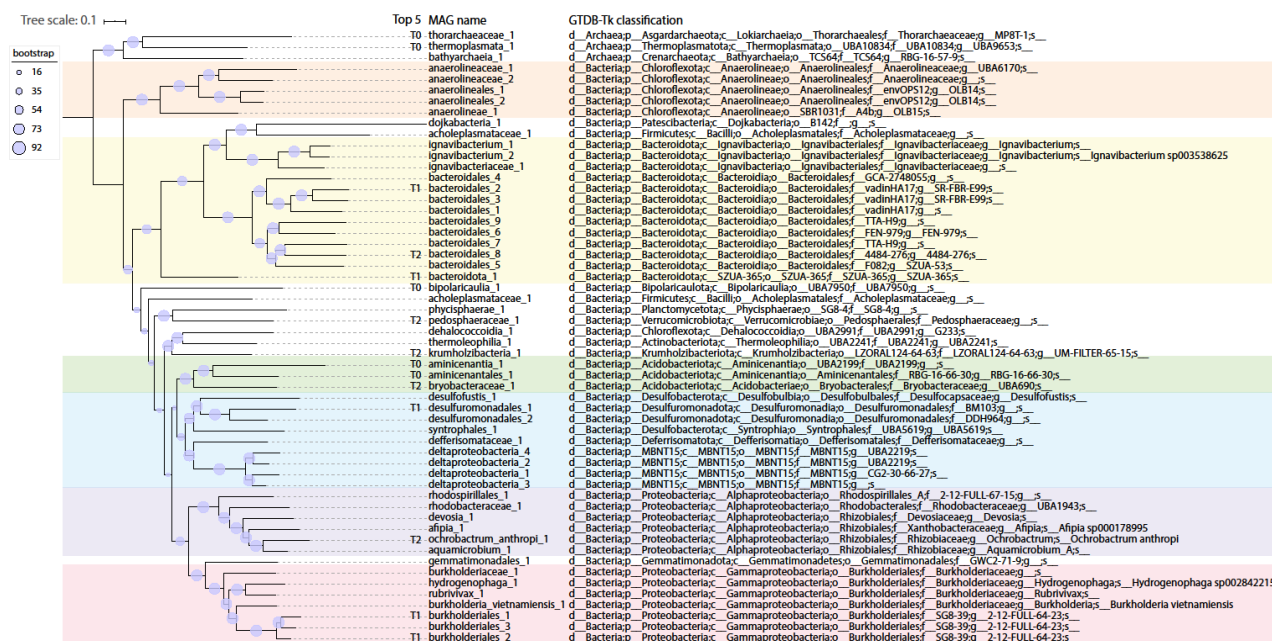

256 **Figure 1 | UBCG phylogenetic tree of MAGs retrieved in this study.** Ninety-two conserved genes  
 257 were used for tree construction (43). MAGs are named after their taxonomy, which was assigned with  
 258 GTDB-Tk (42). The top five most abundant MAGs in each metagenome (T0, T1 and T2) are  
 259 indicated. Colors highlight the following taxa: orange, *Anaerolineae*; yellow, *Bacteroidota*; green,  
 260 *Acidobacteriota*; blue, *Deltaproteobacteria*; purple, *Alphaproteobacteria*; pink,  
 261 *Gammaproteobacteria*.  
 262

263  
 264 The MAGs retrieved in this study generally reflect findings from previous metagenomic and  
 265 16S rRNA gene analyses of sediments from site NB8 (23), which were used as inoculating material  
 266 for the bioreactor in this study. *Anaerolinea* and *Bacteroidetes* were detected at increasing 16S rRNA  
 267 gene-based relative abundances with depth in NB8 and were hypothesized to perform fermentation.  
 268 Other groups previously identified in NB8 via 16S rRNA gene analyses (23) included  
 269 *Verrucomicrobia*, *Planctomycetes*, *Ignavibacteria*, *Actinobacteria*, *Alphaproteobacteria* (particularly  
 270 *Rhodospirillales* and *Rhizobiales*), *Deltaproteobacteria* and *Gammaproteobacteria*. A previously  
 271 recovered MAG classified as *Aminicenantes* had potential for acetogenesis, sulfate reduction and  
 272 fermentation, while *Thorarchaeota* and *Bathyarchaeota* MAGs were hypothesized to participate in  
 273 fermentative production of acetate, formate and ethanol (23). Similarly, other studies (24, 57–59) that  
 274 sequenced DNA from Baltic Sea water or sediments have identified several common groups,  
 275 including *Acidobacteria*, *Actinobacteria*, *Bacteroidetes*, *Chloroflexi*, *Firmicutes*,



276 *Gemmatimonadetes*, *Planctomycetes*, *Alphaproteobacteria*, *Deltaproteobacteria*,  
277 *Gammaproteobacteria*, *Thermoplasmata* and *Verrucomicrobia*.

278 Shifts in microbial community composition detected in this study via several metagenomic  
279 analyses (further detailed in the next sections) highlight microbial successions over time and might  
280 be explained by a combination of factors. Firstly, we hypothesize that, due to high terrestrial influence  
281 in the Bothnian Sea, sediments used as inoculum carried recalcitrant organic matter (60) that could  
282 have been gradually degraded, providing differing pools of carbon at times and thus affecting  
283 microbial community structure. Secondly, carbon fixation and biomass turnover might also have  
284 provided different pools of organic matter into the reactor. Finally, monthly shots of Fe(OH)<sub>3</sub>  
285 nanoparticles in addition to the constant inflow of Fe(III)NTA starting approximately one year after  
286 reactor inoculation may have changed the bioreactor conditions periodically.

287

### 288 **Marker gene analyses highlight potential for methane and iron cycling, as well as oxygen** 289 **respiration**

290 Genes of interest were searched in MAGs in order to investigate functional potential for  
291 methane and iron cycling, as well as respiratory metabolisms (oxygen reduction, denitrification, and  
292 sulfate reduction) and carbon fixation pathways. The analyzed marker genes for methane cycling  
293 were subunits of the methyl-coenzyme A reductase (*mcrA*, *mcrB*, and *mcrG*), soluble methane  
294 monooxygenase (*mmoB* and *mmoX*) and particulate methane monooxygenase (*pmoA* and *pmoB*).  
295 RPKM values derived from read mapping to genes were used as proxy for gene abundance across the  
296 three metagenomes.

297 No canonical soluble (*mmo*) or particulate (*pmo*) methane monooxygenase genes were found  
298 in this study's entire dataset. Five *mcr* genes with best blastp hits to the ANME-2 cluster archaeon  
299 assembly GCA\_009649835.1 were identified in unbinned contigs (three in the same one). RPKM  
300 values indicate the organism represented by these genes was abundant in original sediments but was  
301 selected against in the reactor (Figure S2). While it is unclear why archaea did not thrive in the reactor,  
302 we hypothesize that keeping the reactor at atmospheric pressure and room temperature (21 °C) might  
303 have played a role as methane dissolves less in the liquid phase in comparison to a pressurized setting  
304 at colder temperatures. The identification of *mcr* genes aligns with previous 16S rRNA gene analyses  
305 of NB8 sediments (23), which revealed ANME-2a/b dominated archaeal communities at depths 14-  
306 30, 34-45 and 50-63 cm in this site (in the SMTZ and below as well). Archaea affiliating to this group  
307 were hypothesized to mediate SO<sub>4</sub><sup>2-</sup>- and Fe-AOM in distinct sediment zones (23), directly reducing  
308 iron or, alternatively, transferring electrons to an iron-reducing organism.

309

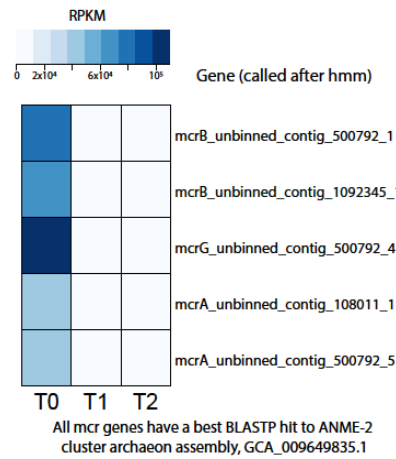

310

311 **Figure S2 | Heat map of *mcr* genes in the three metagenomes (T0, T1, and T2).** RPKM values  
 312 were calculated from read mapping with BMap and imported into RStudio for heat map  
 313 construction. Protein sequences were used for blastp against the NCBI RefSeq database.

314

315 Next, we looked at C1 metabolism. Genes encoding nicotinamide adenine dinucleotide  
 316 (NAD)-dependent methanol dehydrogenases were found in the following 13 MAGs:  
 317 bryobacteraceae\_1, thermoleophilia\_1, aminicenantales\_1, burkholderiales\_1, burkholderiales\_2,  
 318 burkholderiales\_3, anaerolineaceae\_1, deltaproteobacteria\_1, deltaproteobacteria\_2, desulfofustis\_1,  
 319 devosia\_1, rhodospirillales\_1, and pedosphaeraceae\_1. Shifts in microbial community were also  
 320 apparent from RPKM values of methanol dehydrogenases over time (Figure S3). By T2, MAG  
 321 pedosphaeraceae\_1 had the methanol dehydrogenase with the highest RPKM value, followed by  
 322 rhodospirillales\_1, and deltaproteobacteria\_1.

323

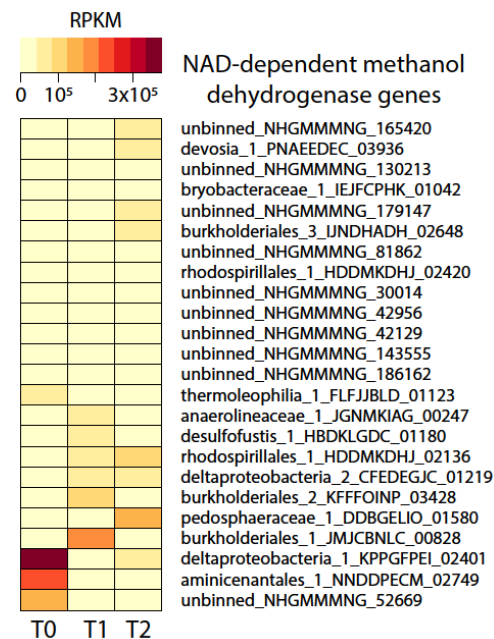

324

325 **Figure S2 | Heat map of NAD-dependent methanol dehydrogenase genes in the three**  
 326 **metagenomes (T0, T1, and T2).** RPKM values were calculated from read mapping with BMap and

327 imported into RStudio for heat map construction. Protein sequences were identified via prokka  
328 annotations.

329         Marker genes for iron oxidation and iron reduction were searched with FeGenie (49). Marker  
330 genes for iron oxidation identified in some MAGs of this study (Figure 2) encoded the following:  
331 *cyc2*, iron oxidases; *cyc1*, periplasmic cytochrome *c*<sub>4</sub>, part of an iron oxidation complex; *foxE*, a *c*-  
332 type cytochrome; and *foxY*, a protein containing the redox cofactor pyrroloquinoline quinone (PQQ).  
333 Other MAGs had marker genes for iron reduction that encoded several porins and outer membrane  
334 *c*-type cytochromes described in a variety of iron-reducing microorganisms (49). RPKM values for  
335 these genes highlighted microbial community shifts over time in the reactor (Figure 2). The  
336 *desulfuromonadales\_1* MAG appeared to be particularly abundant in T1, when the reactor started to  
337 receive monthly inputs of Fe(OH)<sub>3</sub> nanoparticles in addition to the constant inflow of Fe(III)NTA  
338 provided in the medium. At T2, when the supply of ferrihydrite was stopped, the functional guild of  
339 iron reduction seemed to be spread across other members represented by MAGs  
340 *deltaproteobacteria\_4*, *ignavibacteriaceae\_1*, *deltaproteobacteria\_1*, and *krumholzibacteria\_1*. As for  
341 iron oxidation, three MAGs had *cyc2* genes: *aminicenantales\_1* and *aminicenantia\_1*, which may  
342 represent iron-oxidizing microorganisms in original sediments, and *krumholzibacteria\_1*, which  
343 seemed abundant at the latest enrichment culture metagenome (T2). These results are supported by  
344 whole reactor activity tests performed 6 months after reactor inoculation, which provided evidence  
345 for iron reduction (Figure S1). While we did not conduct iron oxidation activity tests, we hypothesize  
346 iron (II) produced from iron (III) reduction could have fueled iron oxidation in the bioreactor. Traces  
347 of oxygen could have been the possible electron acceptor for this process. While *Deltaproteobacteria*  
348 and *Ignavibacteria* are known iron reducers (61, 62), *Aminicenantes* have only recently been  
349 suggested to perform iron oxidation due to the identification of *cyc2* gene sequences in draft genomes  
350 (49), corroborating findings from this study. Given the widespread occurrence of *Aminicenantes*  
351 bacteria in Bothnian Sea sediments (23), their contribution to iron cycling could be significant. The  
352 potential for iron reduction (via OmcS) and oxidation (via Cyc2) in *Krumholzibacteria* is described  
353 here for the first time.

354

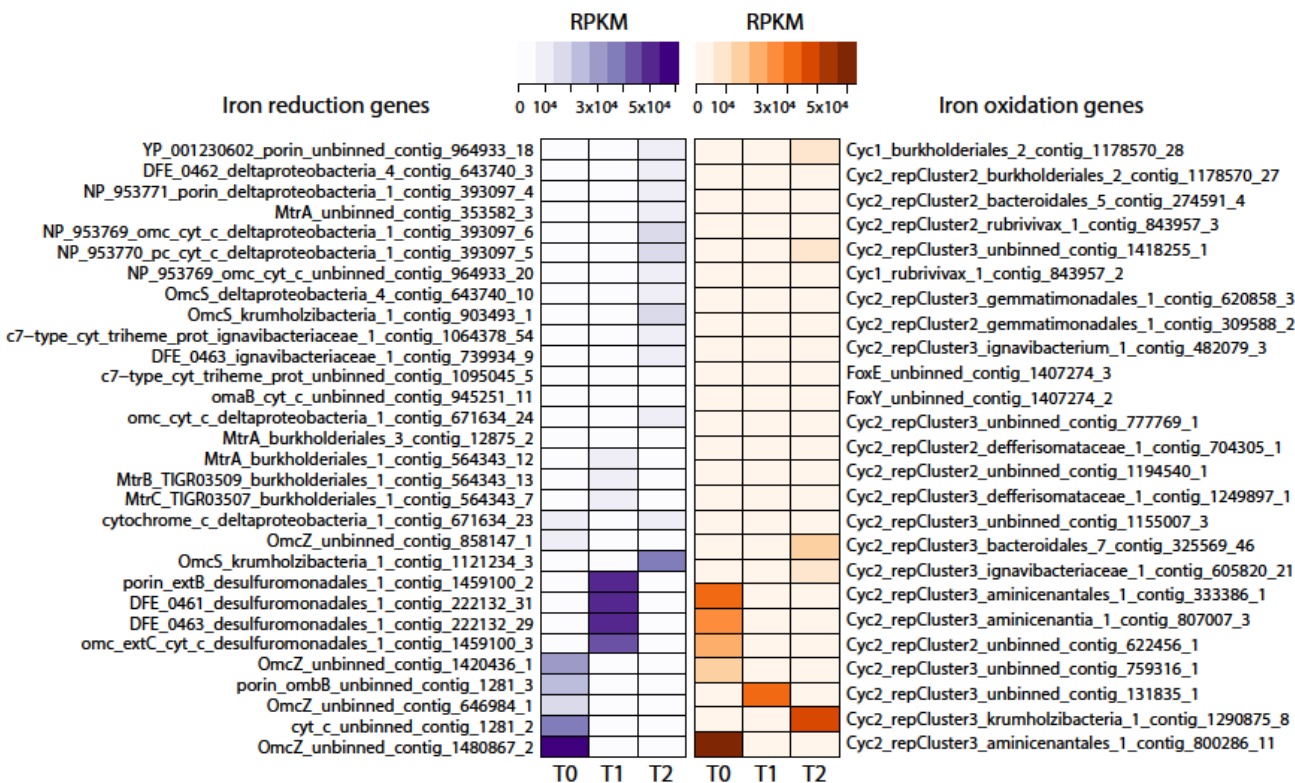

355

356

357

358

359

360

361

362

363

364

365

366

367

368

369

370

371

372

373

374

375

376

377

**Figure 2 | Heat maps of marker genes for iron reduction and iron oxidation in the three metagenomes (T0, T1, and T2).** Marker genes were identified with FeGenie (49). RPKM values were calculated from read mapping with BBMap (<https://sourceforge.net/projects/bbmap>) and imported into RStudio (31) for heat map construction.

MAGs were mined for potential utilization of terminal electron acceptors other than iron (Table S1). The investigated marker genes encode enzymes involved in denitrification (*nar*, *nir*, *nor*, *nos* and *nrf*), sulfate reduction (*dsr*) and oxygen respiration (several quinol and cytochrome *c* oxidases). The gene *dsrA* was found in 8 MAGs, although in *desulfofustis\_1* it likely encodes a protein subunit involved in sulfur oxidation. Marker genes for denitrification and/or dissimilatory nitrate reduction to ammonium (DNRA) were present in 48 MAGs, but none had the full denitrification pathway. Potential for oxygen respiration was also widespread: 37 MAGs had *cox* genes, 19 had *cbb*<sub>3</sub>-type subunit-encoding genes, and 32 had *cyd* genes. The widespread functional potential for the utilization of alternative terminal electron acceptors has been previously reported: potential for dissimilatory sulfate reduction was detected in previous NB8 MAGs affiliated to *Bacteroidales*, *Xanthomonadales/Chromatiales*, *Aminicenantes*, *Syntrophobacterales*, and *Gemmatimonadales* (23). In an investigation of Bothnian Sea site US5B, *narG*, *napA*, *nirK*, *nirS*, *nor*, *nosZ*, and *nrfA* were identified across the depth profile, but seemed particularly abundant at shallower sediments, where nitrogen oxides would be available for respiration (24).

The persistence of oxygen respiration potential in oxygen-depleted sediments may occur upon rapid burial of metabolically versatile microorganisms due to high sedimentation rates, as reported for our study site (26). In surface sediments where oxygen is still available (here: 0-3 mm depth in

378 summer (63)), oxygen respiration is expected to be the predominant metabolic mode. As  
379 microorganisms are buried and oxygen becomes depleted, alternative electron acceptors and  
380 metabolic pathways might then be employed by these microorganisms.

381 Genes involved in carbon fixation pathways were investigated in order to determine potential  
382 for autotrophy, which could have accounted for inputs of organic matter into the reactor (Table S1).  
383 Our results indicate widespread potential for carbon fixation among MAGs: ribulose biphosphate  
384 carboxylase (RuBisCO) genes were used as markers for the Calvin-Benson-Bassham cycle and were  
385 identified in 7 MAGs. Genes encoding 2-oxoglutarate synthase and pyruvate-ferredoxin/flavodoxin  
386 oxidoreductase, markers for the reverse tricarboxylic acid (TCA) pathway, were both found in 30  
387 MAGs. Genes for acetyl-CoA/propionyl-CoA carboxylase, markers of the 3-hydroxypropionate  
388 cycle, were found in 22 MAGs. Finally, the carbon monoxide dehydrogenase/acetyl-CoA synthase,  
389 marker for the reductive acetyl-CoA pathway, was encoded in 8 MAGs.

390

### 391 **Enrichment of a novel *Verrucomicrobia*, *Bacteroidetes*, and *Krumholzibacteria* microorganisms**

392 The MAG pedosphaeraceae\_1 likely represented an abundant microorganism enriched after  
393 ~2.5 years of reactor operation. The estimated genome completeness was 98.6%, with 8.8%  
394 redundancy. This MAG had most genes encoding enzymes in the aerobic pathway for methane  
395 oxidation, with the exception of a canonical methane monooxygenase. However, pedosphaeraceae\_1  
396 harbored 7 *pmoA*-family sequences that, in a phylogenetic tree with verrucomicrobial reference  
397 sequences, formed a cluster (indicated by the number 2, green highlight, in Figure 3) with other  
398 hypothetical proteins and *pmoA*-family sequences. Another cluster (indicated by 1, purple highlight,  
399 in Figure 3), monophyletic with cluster 2, contained mostly canonical reference *pmoA* sequences,  
400 while sequences not in these clusters were mostly reference *pmoB*.

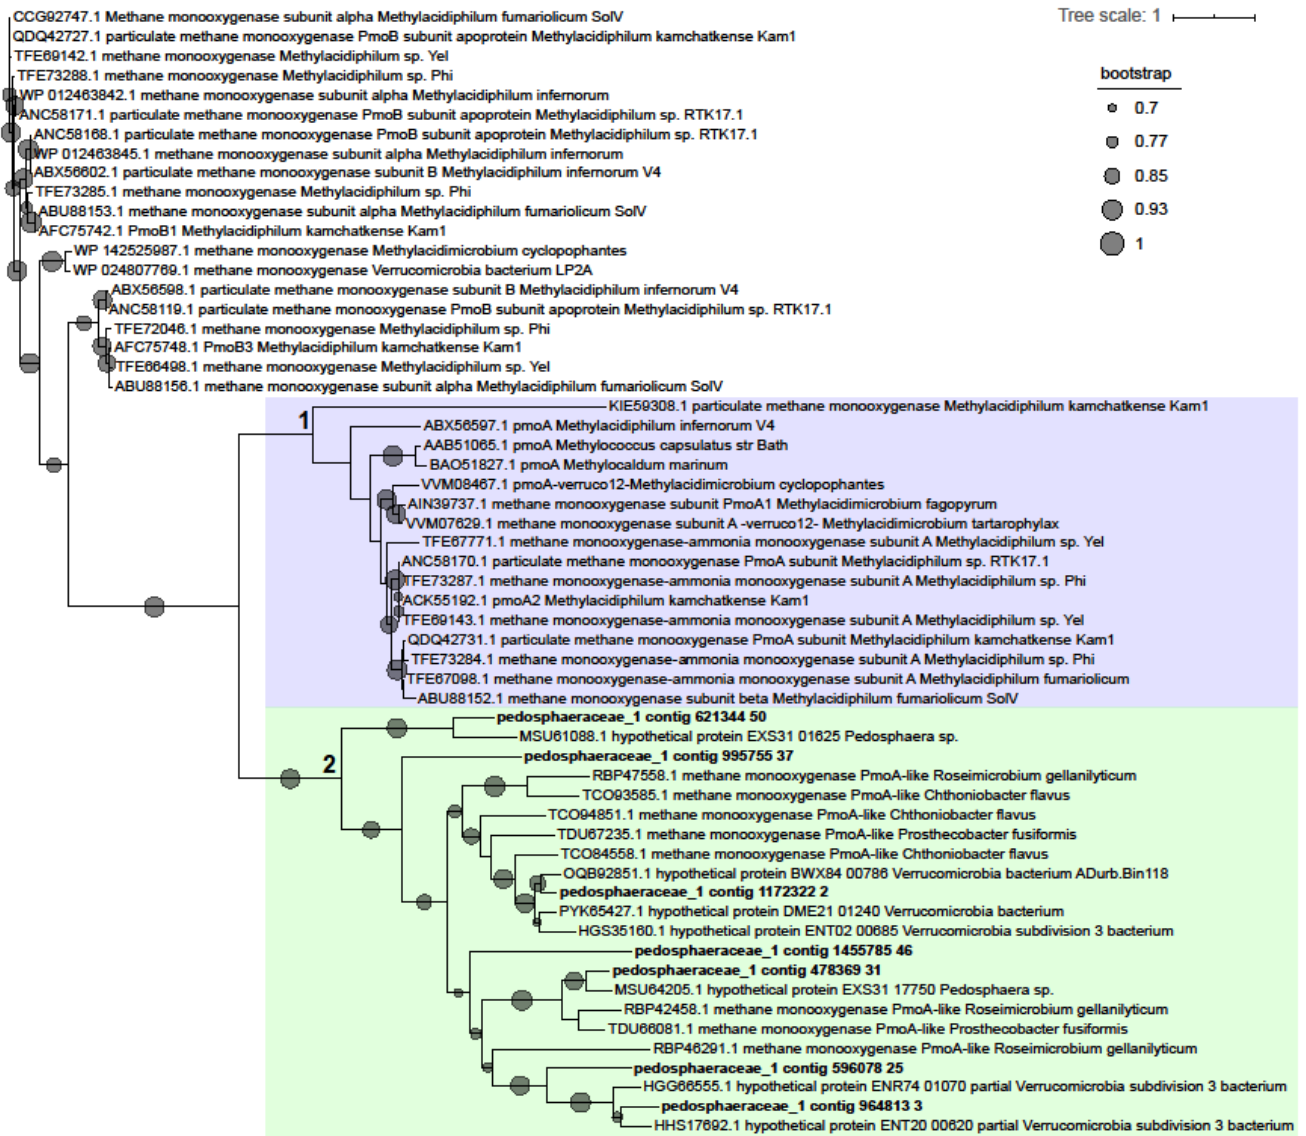

401

402

403

404

405

406

407

408

409

410

411

412

413

414

415

**Figure 3 | Phylogenetic tree of PmoA-family sequences found in the MAG pedosphaeraceae\_1 and reference verrucomicrobial sequences.** Reference sequences were retrieved from the NCBI RefSeq database and are indicated by accession numbers. Sequences were aligned with MUSCLE (53), alignment columns were stripped with trimal (54), and the tree was built with FastTree (55) using the Jones-Taylor-Thornton model of amino acid evolution (64).

Other genes in the pathway for aerobic methane oxidation included an NAD-dependent methanol dehydrogenase, the three proteins involved in the tetrahydrofolate pathway for formaldehyde oxidation to formate, and a formate dehydrogenase gamma subunit (other subunits were missing). Electron transport chain proteins for oxygen respiration were mostly present: all subunits of the NADH dehydrogenase (type I), subunits *sdhABC* encoding succinate dehydrogenase, oxygen reductase-encoding genes *cyoE*, *ctaA*, *coxC*, *ccb3*-type subunits I/II and III, and *cydAB*. Nitrogen dissimilatory metabolism genes *narGH*, *napAB*, *norB*, and *nrfAH* were also present in the genome, as well as all genes in glycolysis, the TCA cycle and the pentose phosphate pathway. Marker

416 genes for the reverse TCA cycle (*korAB*, *por/nifJ*, *porB*) and for the 3-hydroxypropionate cycle  
 417 (*accABCD*), as well as the *acs* gene encoding acetyl-CoA synthetase, indicated potential for carbon  
 418 fixation. The metabolic potential of pedosphaeraceae\_1 is summarized in Figure 4.  
 419

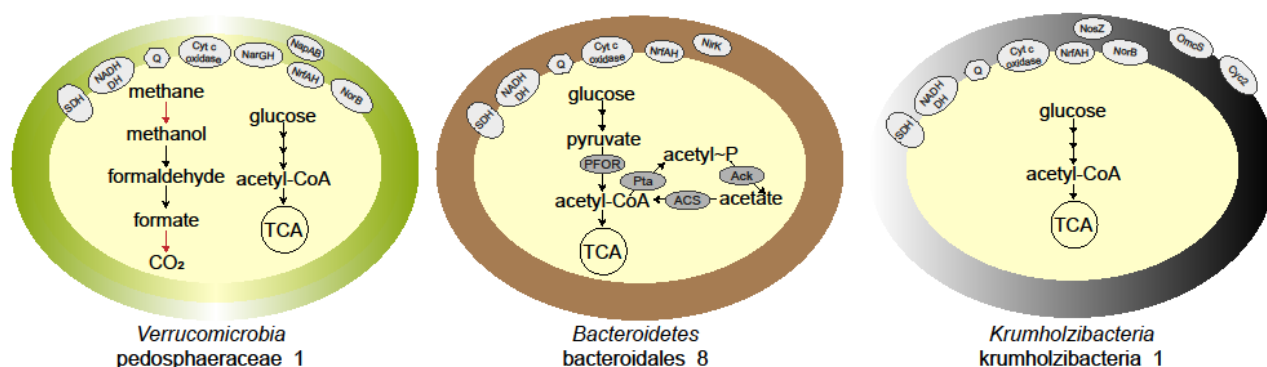

420  
 421 **Figure 4 | Highlights of metabolic potential found in the three enriched microorganisms after**  
 422 **~2.5 years of bioreactor operation.** MAG name and taxonomy are indicated below each cartoon.  
 423 Red arrows indicate the protein was not clearly identified or subunits are missing. Abbreviations are  
 424 as follows: SDH, succinate dehydrogenase; NADH DH, NADH dehydrogenase; Q, quinone; TCA,  
 425 tricarboxylic acid cycle; PFOR, pyruvate:ferredoxin oxidoreductase; Pta, phosphotransacetylase;  
 426 Ack, acetate kinase; ACS, acetyl-CoA synthetase, Nar, nitrate reductase; Nap, periplasmic nitrate  
 427 reductase, Nir, nitric oxide-forming nitrite reductase; Nor, nitric oxide reductase; Nos, nitrous oxide  
 428 reductase; Nrf, ammonia-forming nitrite reductase; OmcS, outer membrane *c*-type cytochrome;  
 429 Cyc2, iron oxidase.

430 By T2 (29 months after reactor inoculation), when pedosphaeraceae\_1 was most abundant,  
 431 *mcr* genes present in unbinned contigs had low RPKM values (~2000-2500) in comparison to *pmoA*-  
 432 family genes present in pedosphaeraceae\_1 (~15000-23000). Activity tests suggest that the bioreactor  
 433 biomass was actively oxidizing methane 6 months after reactor inoculation, and that the biomass was  
 434 responsive to oxygen, which promoted methane oxidation in serum bottle incubations performed in  
 435 the second year of reactor operation (Figure S1). These results support the role of a methane-oxidizing  
 436 microorganism thriving under the low dissolved oxygen concentrations (4.7 - 0.27  $\mu$ M) generally  
 437 measured in the reactor (Figure S1). Although activity data did not coincide with DNA extraction  
 438 times, the presence of high affinity oxygen reductases in the genome indicated that MAG  
 439 pedosphaeraceae\_1 could have been responsible for methane oxidation potentially coupled to oxygen  
 440 reduction. We hypothesize that a divergent particulate methane monooxygenase in the PMO family  
 441 or a canonical methane monooxygenase missing from the genome could have accounted for the  
 442 activity of methane oxidation. Methanol leakage from pedosphaeraceae\_1 could have sustained other  
 443 community members such as bryobacteraceae\_1 and rhodospirillales\_1, which also had methanol  
 444 dehydrogenases and represented 4.3% and 3.5% of metagenome reads at T2, respectively.  
 445 Alternatively, pedosphaeraceae\_1 might have thrived on methanol oxidation, which leaves the  
 446 questions of what was the source of methanol and which microorganism oxidized methane in the  
 447 bioreactor.

448 A previous investigation (23) showed that verrucomicrobial 16S rRNA gene sequences  
449 dominated bacterial communities at site NB8 (and at the nearby site N10) in the top 4 cm of the  
450 sediment, but were also present throughout the entire depth profile of NB8 at lower abundances. In  
451 this same top 4cm-depth, few sequences of canonical methane-oxidizing proteobacteria were  
452 identified (23). *Verrucomicrobia* were suggested to degrade polysaccharides and algal material while  
453 performing aerobic metabolism or denitrification at shallower depths. In deeper sediments, however,  
454 oxygen and sulfate are depleted, and iron reduction is predicted to predominate (26). This indicates  
455 that *Verrucomicrobia* may be metabolically versatile and capable of surviving under oxygen-depleted  
456 conditions, and that the enrichment of such microorganisms has relevance for biogeochemical cycling  
457 *in-situ*. We hypothesize that *Verrucomicrobia* potentially oxidizing methane with a distinct methane  
458 monooxygenase might thrive in a niche in shallow sediments where the transition from low to zero  
459 oxygen occurs (Figure 5). In deeper sediments, where oxygen is depleted and the redox potential is  
460 low, archaea would dominate methane oxidation (23). Our results indicate that the methane biofilter  
461 in these coastal marine sediments could be more complex than previously appreciated, comprising  
462 also novel methanotrophs within the *Verrucomicrobia* adapted to low oxygen availability.  
463

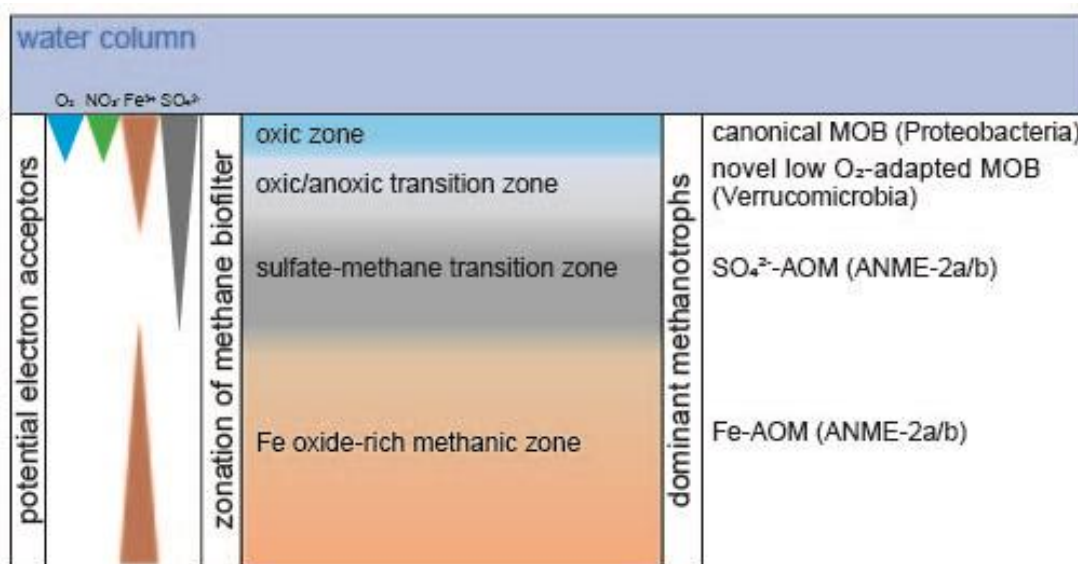

464  
465 Figure 5: Illustration of the hypothesized biological methane filter in the coastal sediments of the  
466 Bothnian Sea. The depth of distinct zones and electron acceptor availability is not to scale.  
467 Abbreviations: MOB, methane-oxidizing bacteria; ANME, anaerobic methane-oxidizing archaea;  
468 AOM, anaerobic oxidation of methane.

469  
470 An important question remains regarding whether pedosphaeraceae\_1 and, more generally,  
471 bacteria utilizing particulate methane monooxygenase for methane oxidation could couple it to iron  
472 reduction. Under such scenario, very low concentrations of oxygen could suffice for methane  
473 activation by PMO. If pedosphaeraceae\_1 performed Fe-AOM in the bioreactor, the produced Fe(II)  
474 could have served as electron donor for *Krumholzibacteria*. This highly speculative hypothesis is



475 theoretically based on a recent study, which demonstrated that two proteobacterial methanotrophs  
476 reduced ferrihydrite during growth on methane under low oxygen concentrations, in the absence of  
477 known marker genes for iron reduction in both genomes (16). Evidence for this phenomenon became  
478 first available from Lake Kinneret sediment incubations with  $^{13}\text{C}$ -methane and different iron oxide  
479 minerals under oxygen depletion (17). In that study, *pmoA* copy numbers followed trends of  $\delta^{13}\text{C}_{\text{DIC}}$   
480 and iron (II) indicative of Fe-AOM. More recently, *Methylomonadaceae* were suggested to account  
481 for methane oxidation in anoxic waters of Northwestern Siberian lakes (18). The authors  
482 hypothesized that iron (III) could be the electron acceptor for AOM because of total iron  
483 concentrations and the identification of taxa known to perform iron reduction. Adding to that, nitrate  
484 was below their detection limit and nitrite concentrations did not exceed  $0.02 \text{ mg L}^{-1}$  of  $\text{N-NO}_2^-$ ,  
485 which indicated the unavailability of these electron acceptors or their rapid turnover.

486 While the family *Pedosphaeraceae* has no isolates or genomes previously implicated in  
487 methane oxidation, several known methanotrophs within the *Verrucomicrobia* phylum have been  
488 reported, such as *Methylacidiphilum fumarolicum* SolV (65) and others of the same genus, as well  
489 as some species of *Methylacidimicrobium* (66). Our study highlights the metabolic versatility of  
490 organisms in the phylum and indicates *Verrucomicrobia* might play unforeseen roles in marine  
491 environments. Further investigations are needed to elucidate the metabolism of these organisms.

492 MAG bacteroidales\_8 (96.2% complete, 1.6% redundant) had potential for oxygen respiration  
493 via low and high affinity oxygen reductases-encoding genes (*coxBCD*, *ccb3*-type subunits I/II, III,  
494 and IV, and *cydAB*), as well as DNRA via NrfAH (Table S1), and nitrite reduction to nitric oxide via  
495 NirK (Figure 4). Marker genes for the reverse TCA cycle (*korAB*, *por/nifJ*) were present. As most  
496 genes in the glycolysis and TCA pathways were found, we hypothesize that this organism could have  
497 been involved in heterotrophic respiratory metabolism. *Bacteroidetes* have been previously identified  
498 in water and sediment samples from the Baltic and Bothnian Sea (23, 24, 59). *Bacteroidetes*  
499 previously detected in NB8 were hypothesized to perform fermentation, which is also supported by  
500 the presence of a phosphate acetyltransferase, acetate kinase, acetyl-CoA synthetase,  
501 pyruvate:ferredoxin oxidoreductase-encoding gene *pfor*, and the NADP-reducing hydrogenase  
502 HndABCD in bacteroidales\_8. In another study, nine *Bacteroidetes* MAGs retrieved from water  
503 samples of the Baltic Sea also had cytochrome *c* oxidase genes (data retrieved from annotations on  
504 NCBI) and were hypothesized to contribute to the degradation of algal material via carbohydrate  
505 active enzymes (58), which has similarly been reported for *Bacteroidetes* from the North Sea (67).  
506 Given that, as expected in the oligotrophic NB8 site, no cyanobacteria were detected in our  
507 metagenomes, it is more likely that the organism represented by MAG bacteroidales\_8 could have  
508 participated in biomass turnover evidenced by the observed shifts in MAG abundances over time in  
509 the bioreactor. Whether respiratory or fermentative metabolism was employed by this microorganism  
510 remains to be elucidated.

511 MAG krumholzibacteria\_1 (89% complete, 2.5% redundant) seemed to be involved in iron  
512 cycling, harboring OmcS and Cyc2-encoding genes that had high RPKM values by T2 (Figures 2 and  
513 4). It is intriguing that krumholzibacteria\_1 had both iron oxidation and reduction genes. The capacity

514 for iron oxidation and reduction in the same organism has been previously described in *Geobacter*  
515 *sulfurreducens* (68, 69). Further studies are necessary to elucidate these potential roles of  
516 *krumholzibacteria\_1* in iron cycling. If *krumholzibacteria\_1* coupled iron oxidation to oxygen  
517 reduction, it must have been able to compete for the limited oxygen present in the bioreactor.  
518 Respiratory metabolism genes present in this MAG indicated this could have been possible: we  
519 identified genes encoding subunits of low and high affinity oxygen reductases (*cox*, *cbb<sub>3</sub>*-type, *cyd*,  
520 and *cyo*). Additionally, *norB*, *nosZ*, and *nrfAH* were present. Arsenic resistance genes *arsC*, *arsB*,  
521 *arsM* and *arsR* were present, as well as complete glycolysis and most genes in the TCA pathway.  
522 Potential for carbon fixation was determined based on the presence of marker genes for the reverse  
523 TCA cycle (*korAB*, *porABC*) and for the 3-hydroxypropionate cycle (*accABCD*), as well as the *acs*  
524 gene encoding acetyl-CoA synthetase. The genome also had a hydroxylamine dehydrogenase *hao*  
525 gene.

526 The functional potential of *krumholzibacteria\_1* differs from that of *Candidatus*  
527 *Krumholzibacterium zodletonense* Zgenome0171<sup>T</sup> (QTKG01.1), type material for the recently  
528 described phylum *Krumholzibacteriota*, recovered from the sulfur-rich Zodletone spring in  
529 southwestern Oklahoma, USA (70). For comparative purposes in this study, the draft genome  
530 QTKG01.1 has been annotated with DRAM (47). While *krumholzibacteria\_1* presented potential to  
531 respire iron, oxygen, nitric oxide, nitrous oxide, and nitrite, QTKG01.1 showed no clear potential to  
532 utilize inorganic external terminal electron acceptors. However, QTKG01.1 harbored a few subunits  
533 of the NADH:quinone oxidoreductase and a complete succinate dehydrogenase, as previously  
534 described, indicating potential for fumarate respiration. A fermentative, heterotrophic lifestyle has  
535 been previously hypothesized, with sugar catabolism genes for glucose and mannose utilization  
536 identified in genome QTKG01.1, as well as amino acid utilization via peptidases. Using DRAM, we  
537 identified carbohydrate-active enzyme (CAZy) sequences for the utilization of arabinose, chitin,  
538 pectin, mixed-linkage glucan and xyloglucan hemicellulose, and polyphenolics in QTKG01.1. Some  
539 functional potential is similar to *krumholzibacteria\_1*, in which we identified CAZy sequences for  
540 the utilization of chitin, mixed-linkage glucan, alpha-mannan, and polyphenolics. These differences  
541 in functional potential between the two genomes can be expected given the degree of taxonomic  
542 novelty and low average amino acid identity (40.9%).

543

## 544 **Conclusion**

545 Biogeochemical evidence for methane and iron cycling in Bothnian Sea sediments (23, 26) highlights  
546 the importance of microbial processes in controlling greenhouse gas emissions from coastal  
547 ecosystems. This investigation of microbial communities from Bothnian Sea sediments under low  
548 oxygen concentrations in a bioreactor receiving methane and iron (III) as main substrates revealed  
549 functional potential for methane and iron cycling in novel taxa. Moreover, this study brought new  
550 hypotheses on the identity and metabolic versatility of microorganisms potentially members of these  
551 functional guilds, such as the enriched *Verrucomicrobia*, *Bacteroidetes* and *Krumholzibacteria*. These  
552 results also indicate that the methane biofilter in coastal sediments may be more diverse than

553 previously thought. Finally, our results are compared to recent evidence that bacterial methanotrophs  
554 may also be capable of anaerobic oxidation of methane. Future studies, which are needed to elucidate  
555 *in-situ* metabolic activity and mechanisms for methane and iron cycling in Bothnian Sea sediments,  
556 will benefit from the insights gained in this work.

557

### 558 **Acknowledgements**

559 We thank Annika Vaksmaa for DNA extractions and useful discussions, Theo van Alen for sequencing  
560 the metagenomes, Jeroen Frank for binning support and Matthias Egger for assistance with sampling.

561

### 562 **Author contribution**

563 PDM conducted metagenomic analyses, made figures, deposited data on NCBI, and wrote the  
564 manuscript. ADJ inoculated the bioreactor, maintained it for ~2.5 years and performed activity assays.  
565 WKL, NvH and CPS organized the sampling campaign, collected sediments, and informed bioreactor  
566 set up and experiments. MSMJ, CUW, and OR planned and guided experiments and analyses. All  
567 authors revised the manuscript and agreed on its submission.

568

### 569 **Funding**

570 This work was funded by the Nederlandse Organisatie voor Wetenschappelijk Onderzoek (NWO)  
571 grant ALWOP.293 [CUW], SIAM Gravitation Grant 024.002.002 [MSMJ], NESSC Gravitation  
572 Grant 024.002.001 [MSMJ, CPS] and ERC Marix grant 854088 [MSMJ, CPS].

573

### 574 **References**

- 575 1. Shindell DT, Faluvegi G, Koch DM, Schmidt GA, Linger N, Bauer SE. 2009. Improved  
576 attribution of climate forcing to emissions. *Science* (80- ) 326:716–718.
- 577 2. Knittel K, Boetius A. 2009. Anaerobic Oxidation of Methane: Progress with an Unknown  
578 Process. *Annu Rev Microbiol* 63:311–334.
- 579 3. Egger M, Riedinger N, Mogollón JM, Jørgensen BB. 2018. Global diffusive fluxes of  
580 methane in marine sediments. *Nat Geosci* 11:421–425.
- 581 4. Aromokeye DA, Kulkarni AC, Elvert M, Wegener G, Henkel S, Coffinet S, Eickhorst T, Oni  
582 OE, Richter-Heitmann T, Schnakenberg A, Taubner H, Wunder L, Yin X, Zhu Q, Hinrichs K-  
583 U, Kasten S, Friedrich MW. 2020. Rates and Microbial Players of Iron-Driven Anaerobic  
584 Oxidation of Methane in Methanic Marine Sediments. *Front Microbiol* 10.
- 585 5. Riedinger N, Formolo MJ, Lyons TW, Henkel S, Beck A, Kasten S. 2014. An inorganic  
586 geochemical argument for coupled anaerobic oxidation of methane and iron reduction in  
587 marine sediments. *Geobiology* 12:172–181.
- 588 6. Egger M, Rasigraf O, Sapart CJ, Jilbert T, Jetten MSM, Röckmann T, van der Veen C, Bândă  
589 N, Kartal B, Ettwig KF, Slomp CP. 2015. Iron-Mediated Anaerobic Oxidation of Methane in  
590 Brackish Coastal Sediments. *Environ Sci Technol* 49:277–283.
- 591 7. Beal EJ, House CH, Orphan VJ. 2009. Manganese- and Iron-Dependent Marine Methane  
592 Oxidation. *Science* (80- ) 325:184–187.
- 593 8. Ettwig KF, Zhu B, Speth D, Keltjens JT, Jetten MSM, Kartal B. 2016. Archaea catalyze iron-  
594 dependent anaerobic oxidation of methane. *Proc Natl Acad Sci* 113:12792–12796.
- 595 9. Raghoebarsing AA, Pol A, van de Pas-Schoonen KT, Smolders AJP, Ettwig KF, Rijpstra  
596 WIC, Schouten S, Damsté JSS, Op den Camp HJM, Jetten MSM, Strous M. 2006. A

- 597 microbial consortium couples anaerobic methane oxidation to denitrification. *Nature*  
598 440:918–921.
- 599 10. Haroon MF, Hu S, Shi Y, Imelfort M, Keller J, Hugenholtz P, Yuan Z, Tyson GW. 2013.  
600 Anaerobic oxidation of methane coupled to nitrate reduction in a novel archaeal lineage.  
601 *Nature* 500:567–570.
- 602 11. Cai C, Leu AO, Xie G-J, Guo J, Feng Y, Zhao J-X, Tyson GW, Yuan Z, Hu S. 2018. A  
603 methanotrophic archaeon couples anaerobic oxidation of methane to Fe(III) reduction. *ISME*  
604 *J* 12:1929–1939.
- 605 12. Leu AO, Cai C, McIlroy SJ, Southam G, Orphan VJ, Yuan Z, Hu S, Tyson GW. 2020.  
606 Anaerobic methane oxidation coupled to manganese reduction by members of the  
607 *Methanoperedenaceae*. *ISME J* 14:1030–1041.
- 608 13. Arshad A, Speth DR, de Graaf RM, Op den Camp HJM, Jetten MSM, Welte CU. 2015. A  
609 Metagenomics-Based Metabolic Model of Nitrate-Dependent Anaerobic Oxidation of  
610 Methane by *Methanoperedens*-Like Archaea. *Front Microbiol* 6:1423.
- 611 14. Berger S, Frank J, Dalcin Martins P, Jetten MSM, Welte CU. 2017. High-Quality Draft  
612 Genome Sequence of “*Candidatus Methanoperedens* sp.” Strain BLZ2, a Nitrate-Reducing  
613 Anaerobic Methane-Oxidizing Archaeon Enriched in an Anoxic Bioreactor. *Genome*  
614 *Announc* 5.
- 615 15. Leu AO, McIlroy SJ, Ye J, Parks DH, Orphan VJ, Tyson GW. 2020. Lateral Gene Transfer  
616 Drives Metabolic Flexibility in the Anaerobic Methane-Oxidizing Archaeal Family  
617 *Methanoperedenaceae*. *MBio* 11.
- 618 16. Zheng Y, Wang H, Liu Y, Zhu B, Li J, Yang Y, Qin W, Chen L, Wu X, Chistoserdova L, Zhao  
619 F. 2020. Methane-Dependent Mineral Reduction by Aerobic Methanotrophs under Hypoxia.  
620 *Environ Sci Technol Lett* 7:606–612.
- 621 17. Bar-Or I, Elvert M, Eckert W, Kushmaro A, Vigderovich H, Zhu Q, Ben-Dov E, Sivan O.  
622 2017. Iron-Coupled Anaerobic Oxidation of Methane Performed by a Mixed Bacterial-  
623 Archaeal Community Based on Poorly Reactive Minerals. *Environ Sci Technol*.
- 624 18. Cabrol L, Thalasso F, Gandois L, Sepulveda-Jauregui A, Martinez-Cruz K, Teisserenc R,  
625 Tananaev N, Tveit A, Svenning MM, Barret M. 2020. Anaerobic oxidation of methane and  
626 associated microbiome in anoxic water of Northwestern Siberian lakes. *Sci Total Environ*.
- 627 19. Ettwig KF, Butler MK, Le Paslier D, Pelletier E, Mangenot S, Kuypers MMM, Schreiber F,  
628 Dutilh BE, Zedelius J, De Beer D, Gloerich J, Wessels HJCT, Van Alen T, Luesken F, Wu  
629 ML, Van De Pas-Schoonen KT, Op Den Camp HJM, Janssen-Megens EM, Francoijs KJ,  
630 Stunnenberg H, Weissenbach J, Jetten MSM, Strous M. 2010. Nitrite-driven anaerobic  
631 methane oxidation by oxygenic bacteria. *Nature* 464:543–548.
- 632 20. Ettwig KF, Speth DR, Reimann J, Wu ML, Jetten MSM, Keltjens JT. 2012. Bacterial oxygen  
633 production in the dark. *Front Microbiol* 3.
- 634 21. Algesten G, Brydsten L, Jonsson P, Kortelainen P, Löfgren S, Rahm L, Råike A, Sobek S,  
635 Tranvik L, Wikner J, Jansson M. 2006. Organic carbon budget for the Gulf of Bothnia. *J Mar*  
636 *Syst* 63:155–161.
- 637 22. Myllykangas J-P, Rissanen AJ, Hietanen S, Jilbert T. 2020. Influence of electron acceptor  
638 availability and microbial community structure on sedimentary methane oxidation in a boreal  
639 estuary. *Biogeochemistry* 148:291–309.
- 640 23. Rasigraf O, Helmond NAGM, Frank J, Lenstra WK, Egger M, Slomp CP, Jetten MSM. 2020.  
641 Microbial community composition and functional potential in Bothnian Sea sediments is  
642 linked to Fe and S dynamics and the quality of organic matter. *Limnol Oceanogr* 65:S113–  
643 S133.
- 644 24. Rasigraf O, Schmitt J, Jetten MSM, Lüke C. 2017. Metagenomic potential for and diversity  
645 of N-cycle driving microorganisms in the Bothnian Sea sediment. *Microbiologyopen*  
646 6:e00475.

- 647 25. Rooze J, Egger M, Tsandev I, Slomp CP. 2016. Iron-dependent anaerobic oxidation of  
648 methane in coastal surface sediments: Potential controls and impact. *Limnol Oceanogr*  
649 61:S267–S282.
- 650 26. Lenstra WK, Egger M, van Helmond NAGM, Kritzberg E, Conley DJ, Slomp CP. 2018.  
651 Large variations in iron input to an oligotrophic Baltic Sea estuary: impact on sedimentary  
652 phosphorus burial. *Biogeosciences* 15:6979–6996.
- 653 27. van de Graaf AA, de Bruijn P, Robertson LA, Jetten MSM, Kuenen JG. 1996. Autotrophic  
654 growth of anaerobic ammonium-oxidizing micro-organisms in a fluidized bed reactor.  
655 *Microbiology* 142:2187–2196.
- 656 28. Bosch J, Fritzsche A, Totsche KU, Meckenstock RU. 2010. Nanosized Ferrihydrite Colloids  
657 Facilitate Microbial Iron Reduction under Flow Conditions. *Geomicrobiol J* 27:123–129.
- 658 29. Battino R. 1984. The Ostwald coefficient of gas solubility. *Fluid Phase Equilib* 15:231–240.
- 659 30. Lovley DR, Phillips EJP. 1987. Rapid assay for microbially reducible ferric iron in aquatic  
660 sediments. *Appl Environ Microbiol* 53:1536–1540.
- 661 31. R Core Team. 2020. R: A Language and Environment for Statistical Computing. R  
662 Foundation for Statistical Computing, Vienna, Austria.
- 663 32. Wickham H. 2016. *ggplot2: Elegant Graphics for Data Analysis*. Springer-Verlag New York.
- 664 33. Harhangi HR, Le Roy M, van Alen T, Hu B, Groen J, Kartal B, Tringe SG, Quan Z-X, Jetten  
665 MSM, Op den Camp HJM. 2012. Hydrazine Synthase, a Unique Phylomarker with Which To  
666 Study the Presence and Biodiversity of Anammox Bacteria. *Appl Environ Microbiol* 78:752–  
667 758.
- 668 34. Li D, Luo R, Liu C-M, Leung C-M, Ting H-F, Sadakane K, Yamashita H, Lam T-W. 2016.  
669 MEGAHIT v1.0: A fast and scalable metagenome assembler driven by advanced  
670 methodologies and community practices. *Methods* 102:3–11.
- 671 35. Li H, Handsaker B, Wysoker A, Fennell T, Ruan J, Homer N, Marth G, Abecasis G, Durbin  
672 R. 2009. The Sequence Alignment/Map format and SAMtools. *Bioinformatics* 25:2078–  
673 2079.
- 674 36. Graham ED, Heidelberg JF, Tully BJ. 2017. BinSanity: unsupervised clustering of  
675 environmental microbial assemblies using coverage and affinity propagation. *PeerJ* 5:e3035.
- 676 37. Alneberg J, Bjarnason BS, de Bruijn I, Schirmer M, Quick J, Ijaz UZ, Loman NJ, Andersson  
677 AF, Quince C. 2013. CONCOCT: Clustering cONTigs on COverage and ComposiTiOn. *Arxiv*  
678 Prepr arXiv13124038v1 28.
- 679 38. Wu YW, Simmons BA, Singer SW. 2015. MaxBin 2.0: An automated binning algorithm to  
680 recover genomes from multiple metagenomic datasets. *Bioinformatics* 32:605–607.
- 681 39. Kang DD, Li F, Kirton E, Thomas A, Egan R, An H, Wang Z. 2019. MetaBAT 2: an adaptive  
682 binning algorithm for robust and efficient genome reconstruction from metagenome  
683 assemblies. *PeerJ* 7:e7359.
- 684 40. Sieber CMK, Probst AJ, Sharrar A, Thomas BC, Hess M, Tringe SG, Banfield JF. 2018.  
685 Recovery of genomes from metagenomes via a dereplication, aggregation and scoring  
686 strategy. *Nat Microbiol* 3:836–843.
- 687 41. Parks DH, Imelfort M, Skennerton CT, Hugenholtz P, Tyson GW. 2015. CheckM: Assessing  
688 the quality of microbial genomes recovered from isolates, single cells, and metagenomes.  
689 *Genome Res* 25:1043–1055.
- 690 42. Chaumeil P-A, Mussig AJ, Hugenholtz P, Parks DH. 2019. GTDB-Tk: a toolkit to classify  
691 genomes with the Genome Taxonomy Database. *Bioinformatics* 36:1925–1927.
- 692 43. Na S-I, Kim YO, Yoon S-H, Ha S, Baek I, Chun J. 2018. UBCG: Up-to-date bacterial core  
693 gene set and pipeline for phylogenomic tree reconstruction. *J Microbiol* 56:280–285.
- 694 44. Hyatt D, Chen G-L, LoCascio PF, Land ML, Larimer FW, Hauser LJ. 2010. Prodigal:  
695 prokaryotic gene recognition and translation initiation site identification. *BMC*  
696 *Bioinformatics* 11:119.

- 697 45. Moriya Y, Itoh M, Okuda S, Yoshizawa AC, Kanehisa M. 2007. KAAS: an automatic  
698 genome annotation and pathway reconstruction server. *Nucleic Acids Res* 35:W182–W185.
- 699 46. Seemann T. 2014. Prokka: rapid prokaryotic genome annotation. *Bioinformatics* 30:2068–  
700 2069.
- 701 47. Shaffer M, Borton MA, McGivern BB, Zayed AA, La Rosa SL, Solden LM, Liu P, Narrowe  
702 AB, Rodríguez-Ramos J, Bolduc B, Gazitua MC, Daly RA, Smith GJ, Vik DR, Pope PB,  
703 Sullivan MB, Roux S, Wrighton KC. 2020. DRAM for distilling microbial metabolism to  
704 automate the curation of microbiome function. *bioRxiv* 2020.06.29.177501.
- 705 48. Arkin AP, Cottingham RW, Henry CS, Harris NL, Stevens RL, Maslov S, Dehal P, Ware D,  
706 Perez F, Canon S, Sneddon MW, Henderson ML, Riehl WJ, Murphy-Olson D, Chan SY,  
707 Kamimura RT, Kumari S, Drake MM, Brettin TS, Glass EM, Chivian D, Gunter D, Weston  
708 DJ, Allen BH, Baumohl J, Best AA, Bowen B, Brenner SE, Bun CC, Chandonia J-M, Chia J-  
709 M, Colasanti R, Conrad N, Davis JJ, Davison BH, DeJongh M, Devoid S, Dietrich E,  
710 Dubchak I, Edirisinghe JN, Fang G, Faria JP, Frybarger PM, Gerlach W, Gerstein M, Greiner  
711 A, Gurtowski J, Haun HL, He F, Jain R, Joachimiak MP, Keegan KP, Kondo S, Kumar V,  
712 Land ML, Meyer F, Mills M, Novichkov PS, Oh T, Olsen GJ, Olson R, Parrello B, Pasternak  
713 S, Pearson E, Poon SS, Price GA, Ramakrishnan S, Ranjan P, Ronald PC, Schatz MC, Seaver  
714 SMD, Shukla M, Sutormin RA, Syed MH, Thomason J, Tintle NL, Wang D, Xia F, Yoo H,  
715 Yoo S, Yu D. 2018. KBase: The United States Department of Energy Systems Biology  
716 Knowledgebase. *Nat Biotechnol* 36:566–569.
- 717 49. Garber AI, Neelson KH, Okamoto A, McAllister SM, Chan CS, Barco RA, Merino N. 2020.  
718 FeGenie: A Comprehensive Tool for the Identification of Iron Genes and Iron Gene  
719 Neighborhoods in Genome and Metagenome Assemblies. *Front Microbiol* 11:37.
- 720 50. Eddy SR. 2011. Accelerated Profile HMM Searches. *PLoS Comput Biol* 7:e1002195.
- 721 51. Altschul SF, Gish W, Miller W, Myers EW, Lipman DJ. 1990. Basic local alignment search  
722 tool. *J Mol Biol* 215:403–410.
- 723 52. Rodriguez-R LM, Konstantinidis KT. 2016. The enveomics collection: a toolbox for  
724 specialized analyses of microbial genomes and metagenomes. *PeerJ Prepr* 4:e1900v1.
- 725 53. Edgar RC. 2004. MUSCLE: Multiple sequence alignment with high accuracy and high  
726 throughput. *Nucleic Acids Res* 32:1792–1797.
- 727 54. Capella-Gutierrez S, Silla-Martinez JM, Gabaldon T. 2009. trimAl: a tool for automated  
728 alignment trimming in large-scale phylogenetic analyses. *Bioinformatics* 25:1972–1973.
- 729 55. Price MN, Dehal PS, Arkin AP. 2010. FastTree 2 - Approximately maximum-likelihood trees  
730 for large alignments. *PLoS One* 5.
- 731 56. Letunic I, Bork P. 2016. Interactive tree of life (iTOL) v3: an online tool for the display and  
732 annotation of phylogenetic and other trees. *Nucleic Acids Res* 44:W242–W245.
- 733 57. Thureborn P, Lundin D, Plathan J, Poole AM, Sjöberg B-M, Sjöling S. 2013. A  
734 Metagenomics Transect into the Deepest Point of the Baltic Sea Reveals Clear Stratification  
735 of Microbial Functional Capacities. *PLoS One* 8:e74983.
- 736 58. Hugerth LW, Larsson J, Alneberg J, Lindh M V., Legrand C, Pinhassi J, Andersson AF. 2015.  
737 Metagenome-assembled genomes uncover a global brackish microbiome. *Genome Biol*  
738 16:279.
- 739 59. Broman E, Sjöstedt J, Pinhassi J, Dopson M. 2017. Shifts in coastal sediment oxygenation  
740 cause pronounced changes in microbial community composition and associated metabolism.  
741 *Microbiome* 5:96.
- 742 60. Hoikkala L, Kortelainen P, Soenne H, Kuosa H. 2015. Dissolved organic matter in the Baltic  
743 Sea. *J Mar Syst* 142:47–61.
- 744 61. Hedrich S, Schlömann M, Johnson DB. 2011. The iron-oxidizing proteobacteria.  
745 *Microbiology* 157:1551–1564.
- 746 62. Podosokorskaya OA, Kadnikov V V., Gavrilov SN, Mardanov A V., Merkel AY, Karnachuk

- 747 O V., Ravin N V., Bonch-Osmolovskaya EA, Kublanov I V. 2013. Characterization of  
748 *Melioribacter roseus* gen. nov., sp. nov., a novel facultatively anaerobic thermophilic  
749 cellulolytic bacterium from the class *Ignavibacteria*, and a proposal of a novel bacterial  
750 phylum *Ignavibacteriae*. *Environ Microbiol* 15:1759–1771.
- 751 63. Hellemann D, Tallberg P, Bartl I, Voss M, Hietanen S. 2017. Denitrification in an  
752 oligotrophic estuary: a delayed sink for riverine nitrate. *Mar Ecol Prog Ser* 583:63–80.
- 753 64. Jones DT, Taylor WR, Thornton JM. 1992. The rapid generation of mutation data matrices  
754 from protein sequences. *Bioinformatics* 8:275–282.
- 755 65. Pol A, Heijmans K, Harhangi HR, Tedesco D, Jetten MSM, Op den Camp HJM. 2007.  
756 Methanotrophy below pH 1 by a new Verrucomicrobia species. *Nature* 450:874–878.
- 757 66. van Teeseling MCF, Pol A, Harhangi HR, van der Zwart S, Jetten MSM, Op den Camp HJM,  
758 van Niftrik L. 2014. Expanding the Verrucomicrobial Methanotrophic World: Description of  
759 Three Novel Species of *Methylacidimicrobium* gen. nov. *Appl Environ Microbiol* 80:6782–  
760 6791.
- 761 67. Krüger K, Chafee M, Ben Francis T, Glavina del Rio T, Becher D, Schweder T, Amann RI,  
762 Teeling H. 2019. In marine Bacteroidetes the bulk of glycan degradation during algae blooms  
763 is mediated by few clades using a restricted set of genes. *ISME J* 13:2800–2816.
- 764 68. Caccavo F, Lonergan DJ, Lovley DR, Davis M, Stolz JF, McInerney MJ. 1994. *Geobacter*  
765 *sulfurreducens* sp. nov., a hydrogen- and acetate-oxidizing dissimilatory metal-reducing  
766 microorganism. *Appl Environ Microbiol* 60:3752–3759.
- 767 69. Tang H-Y, Holmes DE, Ueki T, Palacios PA, Lovley DR. 2019. Iron Corrosion via Direct  
768 Metal-Microbe Electron Transfer. *MBio* 10.
- 769 70. Youssef NH, Farag IF, Hahn CR, Premathilake H, Fry E, Hart M, Huffaker K, Bird E,  
770 Hambright J, Hoff WD, Elshahed MS. 2019. *Candidatus Krumholzibacterium zodletonense*  
771 gen. nov., sp nov, the first representative of the candidate phylum Krumholzibacteriota phyl.  
772 nov. recovered from an anoxic sulfidic spring using genome resolved metagenomics. *Syst*  
773 *Appl Microbiol* 42:85–93.
- 774
